# Supplementary material
Source: HighWire-hosted journal article supplement (https://www.haematologica.org/content/suppl/2016/01/07/haematol.2015.133900)
Supplement: 2015_133900-Disclosures_and_Contributions.pdf [file 2015_133900-Disclosures_and_Contributions.pdf]

Haematologica  
HAEMATOL/2015/133900  
Version 3

Risk factors for venous thromboembolism in immunoglobulin light chain  
amyloidosis

Disclosures: Vaishali Sanchorawala: Research grants from Takeda, Celgene J. Mark Sloan: Consultancy for Takeda, research funding from Gilead.

Contributions: KB and JMS designed study, performed research and wrote manuscript. LM obtained data for a subportion of this study (bleeding complications), FS performed statistical analysis. LS, AH, JB, VS DS helped with critical review of manuscript and interpretation of data.
